# Supplementary material for: Characterization of Bovine Intraepithelial T Lymphocytes in the Gut
Source: MDPI journal article supplement (doi:10.3390/pathogens12091173), 2023-09-19
Supplement: s1 [file s1]

# **Characterization of bovine intraepithelial T lymphocyte in the gut**

Akanksha Hada<sup>1</sup>, Lei Li<sup>1</sup>, Anmol Kandel<sup>1</sup>, Younggeon Jin<sup>1</sup>, and Zhengguo Xiao<sup>1</sup>

<sup>1</sup>Department of Animal and Avian Sciences, University of Maryland, College Park, Maryland  
20742, USA

Corresponding Author: Zhengguo Xiao, Ph.D.  
Department of Animal and Avian Sciences  
University of Maryland  
College Park, MD 20742 USA  
Phone: 301-405-6258  
FAX: 301-405-7980  
Email: [xiao0028@umd.edu](mailto:xiao0028@umd.edu)

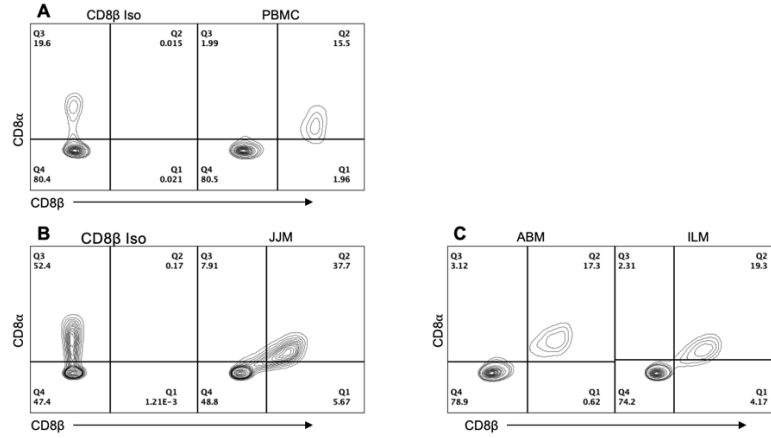

**Supplementary Figure S1:** TCRαβ<sup>+</sup>CD8<sup>+</sup> T-IELs express both CD8α and CD8β. Isolated IELs were stained with anti-bovine CD3, TCRγδ, CD8α, and CD8β. The counterplot was based on CD3<sup>+</sup>TCRγδ<sup>-</sup> cells, using the 5% possibility in Flowjo setting. A: Expression of CD8α and CD8β in TCRαβ<sup>+</sup> cells from PBMCs. Isotype control was anti-CD8β only since anti-CD8α is the most commonly used antibody. B: Expression of CD8α and CD8β in TCRαβ<sup>+</sup> T-IELs isolated from JJM. C: Expression of CD8α and CD8β in TCRαβ<sup>+</sup> T-IELs isolated from ABM and ILM. These are representatives from three experiments.

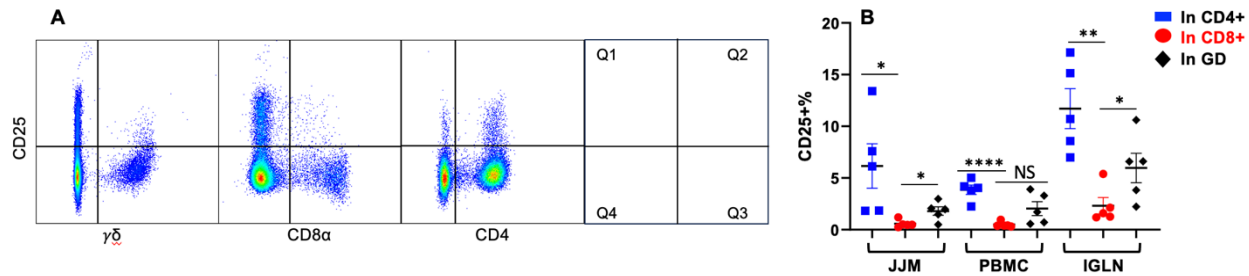

**Supplementary Figure S2:** CD25 is higher in TCRαβ<sup>+</sup>CD4<sup>+</sup> T-IELs than in TCRαβ<sup>+</sup>CD8<sup>+</sup> T-IELs. Isolated IELs were stained with anti-bovine CD3, TCRγδ, CD4, CD8α, and CD8β. Gating for TCRγδ<sup>+</sup> T-IELs or TCRγδ<sup>+</sup> T cells in PBMCs were based on CD3<sup>+</sup>TCRγδ<sup>+</sup>. Gating for TCRαβ<sup>+</sup>CD4<sup>+</sup> or TCRαβ<sup>+</sup>CD8<sup>+</sup> T-IELs or TCRαβ<sup>+</sup> T cells in PBMCs were based on CD3<sup>+</sup>TCRγδ<sup>-</sup>. A: Gating strategy for CD25 expression. The percentage of CD25<sup>+</sup> (CD25<sup>+</sup>%) was calculated based on Q2/(Q2+Q3) x 100%. B: Comparison of CD25<sup>+</sup>% on TCRαβ<sup>+</sup>CD4<sup>+</sup>CD8<sup>+</sup> T-IELs and TCRγδ<sup>+</sup> T-IELs (GD) in different tissues.

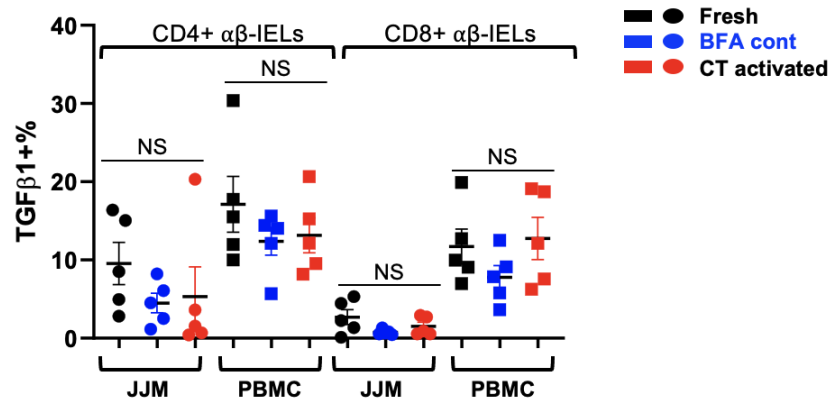

**Supplementary Figure S3:** Activation does not affect TGFβ1 expression in TCRαβ<sup>+</sup>CD4<sup>+</sup> or TCRαβ<sup>+</sup>CD8<sup>+</sup> T-IELs. T-IELs were gated and analyzed in the same manner as in Fig. 5F-G. BFA: Brefeldin A.

**Supplementary Table S1.** Primary antibodies.

| <b>Specificity</b> | <b>Clone</b> | <b>Purified<br/>Primary<br/>Antibody<br/>Isotype</b> | <b>Source</b> |
|--------------------|--------------|------------------------------------------------------|---------------|
| bCD3               | MM1A         | IgG1                                                 | WSUMAC        |
| bTCR $\delta$      | GB21A        | IgG2b                                                | WSUMAC        |
| bCD8b              | BAT82A       | IgG1                                                 | WSUMAC        |
| bCD69              | KTSN7A       | IgG1                                                 | WSUMAC        |
| bCD25              | LCTB2A       | IgG3                                                 | WSUMAC        |
| bIL4               | CC303        | IgG2a                                                | Bio-Rad       |

| <b>Specificity</b> | <b>Clone</b> | <b>Conjugated<br/>Antibody<br/>Isotype</b> | <b>Source</b>     |
|--------------------|--------------|--------------------------------------------|-------------------|
| bCD4               | CC8          | IgG2a-FITC                                 | Bio-Rad           |
| bCD8               | CC63         | IgG2a-RPE                                  | Bio-Rad           |
| bCD8               | CC63         | IgG2a-FITC                                 | Bio-Rad           |
| bCD62L             | CC32         | IgG1-FITC                                  | WSUMAC            |
| bIFN $\gamma$      | CC302        | IgG1-PE                                    | Bio-Rad           |
| hIL-17A            | eBio64DEC17  | IgG1-APC                                   | Invitrogen        |
| hTGF- $\beta$ 1    | TW4-2F8      | IgG1-PE                                    | BD<br>Biosciences |
| rFoxP3             | FJK-16s      | IgG2a-PE                                   | Invitrogen        |

\* b, Bovine. h, Human. r, Rat. WSUMAC, Washington State University Monoclonal Antibody Center. Bio-Rad, Bio-Rad Laboratories, Inc. Hercules, CA, USA.

**Supplementary Table S2.** Secondary antibodies and isotype controls.

| <b>Specificity</b> | <b>Secondary antibodies</b> | <b>Source</b> |
|--------------------|-----------------------------|---------------|
| IgG1               | Anti-mouse IgG1-Biotin      | BioLegend     |

|        |                         |           |
|--------|-------------------------|-----------|
| IgG1   | Anti-mouse IgG1-BV421   | BioLegend |
| IgG2a  | Anti-mouse IgG2a-APC    | BioLegend |
| IgG2a  | Anti-mouse IgG2a-BV421  | BioLegend |
| IgG2a  | Anti-mouse IgG2b-Biotin | BioLegend |
| IgG2a  | Anti-mouse IgG2a-PerCP  | BioLegend |
| IgG2b  | Anti-mouse IgG2b-APC    | BioLegend |
| IgG3   | Anti-mouse IgG3-Biotin  | BioLegend |
| IgG3   | Anti-mouse IgG3-BV421   | BioLegend |
| Biotin | Streptavidin Per-CP     | BioLegend |

**Isotype control antibodies**

**Source**

|                |           |
|----------------|-----------|
| Mouse IgG1     | BioLegend |
| Mouse IgG2a    | BioLegend |
| Mouse IgG2b    | BioLegend |
| Mouse IgG3     | BioLegend |
| Mouse IgG1-APC | BioLegend |
| Mouse IgG1-PE  | BioLegend |
| rat-IgG2a-APC  | BioLegend |
| rat-IgG2a-PE   | BioLegend |
